# Supplementary material for: Impacts of Diwali fireworks on aerosol levels, composition, chemistry, and toxicity: Insights from a combined indoor-outdoor study
Source: Research Square preprint supplement (doi:10.21203/rs.3.rs-8473668/v1), 2026-01-12
Supplement: Supplementary file 1 [file 9d0061c5a0998ab569ee2b3d.docx]

**Impacts of Diwali fireworks on aerosol levels, composition, chemistry, and toxicity: Insights from a combined indoor-outdoor study**

**(Supplementary)**

Debayan Mandal, Abhishek Chakraborty, Vidit Parkar

1. **Minimum detection limit for OC and EC:**

Table SI 1 Minimum detection limit of OC and EC used in the DRI TOA analyzer (DRI 2015) . Units of μg/filter were obtained using a deposit area of 3.53 cm2, typical of 25 mm quartz fiber filters

|  | µg/cm2 | µg/filter |
| --- | --- | --- |
| Total OC | 0.43 | 1.53 |
| Total EC | 0.12 | 0.44 |
| TC | 0.49 | 1.72 |

**2. Quality assurance quality control for Ion Chromatography:**

First and foremost, the correlation coefficient of the individual ions should be at least 0.995; otherwise, the calibrations will be repeated. Quality check standards are analyzed initially and after every 10 analytical runs. The results are compared with known QC; it should not exceed 3% of the known value.

**3.Minimum detection limit (DL) of elements in EDXRF**

Table SI 2 Minimum detection limit (MDL) of elements in EDXRF in ng/cm2 for 45mins of runtime for each sample

| **Element** | **MDL** | **Element** | **MDL** |
| --- | --- | --- | --- |
| Na | 4.7 | Cu | 0.3 |
| Mg | 2.8 | Zn | 0.3 |
| Al | 3.5 | Ga | 0.5 |
| Si | 2.3 | As | 0.8 |
| P | 0.5 | Se | 0.3 |
| S | 0.7 | Br | 0.5 |
| Cl | 0.9 | Sr | 0.3 |
| K | 1 | Zr | 0.7 |
| Ca | 0.7 | Mo | 0.5 |
| Sc | 0.3 | Cd | 8.3 |
| Ti | 0.3 | Sn | 27 |
| V | 0.3 | Sb | 13 |
| Cr | 0.7 | Te | 1 |
| Mn | 0.5 | I | 1 |
| Fe | 0.7 | Cs | 1 |
| Co | 0.7 | Ba | 1.7 |
| Ni | 0.5 | Hg | 0.3 |
| Pb | 0.4 |  |  |

**3. Data inputs for PSC equivalent calculation from Elemental Carbon**

Table SI 3 Risk estimates for ETS (Environmental Tobacco Smoke) exposure (compared to no ETS exposure) in relation to health outcomes, adopted from van der Zee et al. (2016)

| Outcome | Description | Risk estimate (95% CI) |
| --- | --- | --- |
| Lung cancer (LC) | Incidence (> 15yrs) | 1.21 (1.13–1.30) |
| Cardiovascular mortality (CM) | Ischaemic heart disease (IHD) mortality > 15 yrs | 1.27 (1.19–1.36) |

Table SI 4 Risk estimates (95% CI) for equivalent Black Carbon (EBC) concentration and the established health outcomes, adopted from Pani et al. (2020). Used as the Risk estimate of Elemental carbon in the Manuscript

| Outcome | EC (per 1 µg m-3) | References |
| --- | --- | --- |
| Lung cancer (LC) | 1.05 (0.02–1.08) | van der Zee et al., 2016 |
| Cardiovascular mortality (CM) | 1.13 (1.09–1.18) | Smith and Peel 2010 |

**4. W statistics of the PM2.5 concentration in the study locations during different periods**

Table SI 5 W statistics and p values of the PM2.5 concentration in the study locations

| **Set** | **W statistic** | **p-value** |
| --- | --- | --- |
| PrD Indoor | 0.85 | 0.19 |
| PrD Outdoor | 0.87 | 0.25 |
| Di Indoor | 0.92 | 0.52 |
| Di Outdoor | 0.79 | 0.07 |
| PoD Indoor | 0.82 | 0.12 |
| PoD Outdoor | 0.83 | 0.14 |

**5. Ionic Composition in the indoor outdoor location**

**

**

Figure SI 1 Water-soluble inorganic ions in the study locations

**6.Van-krevelen (V-K) diagram**


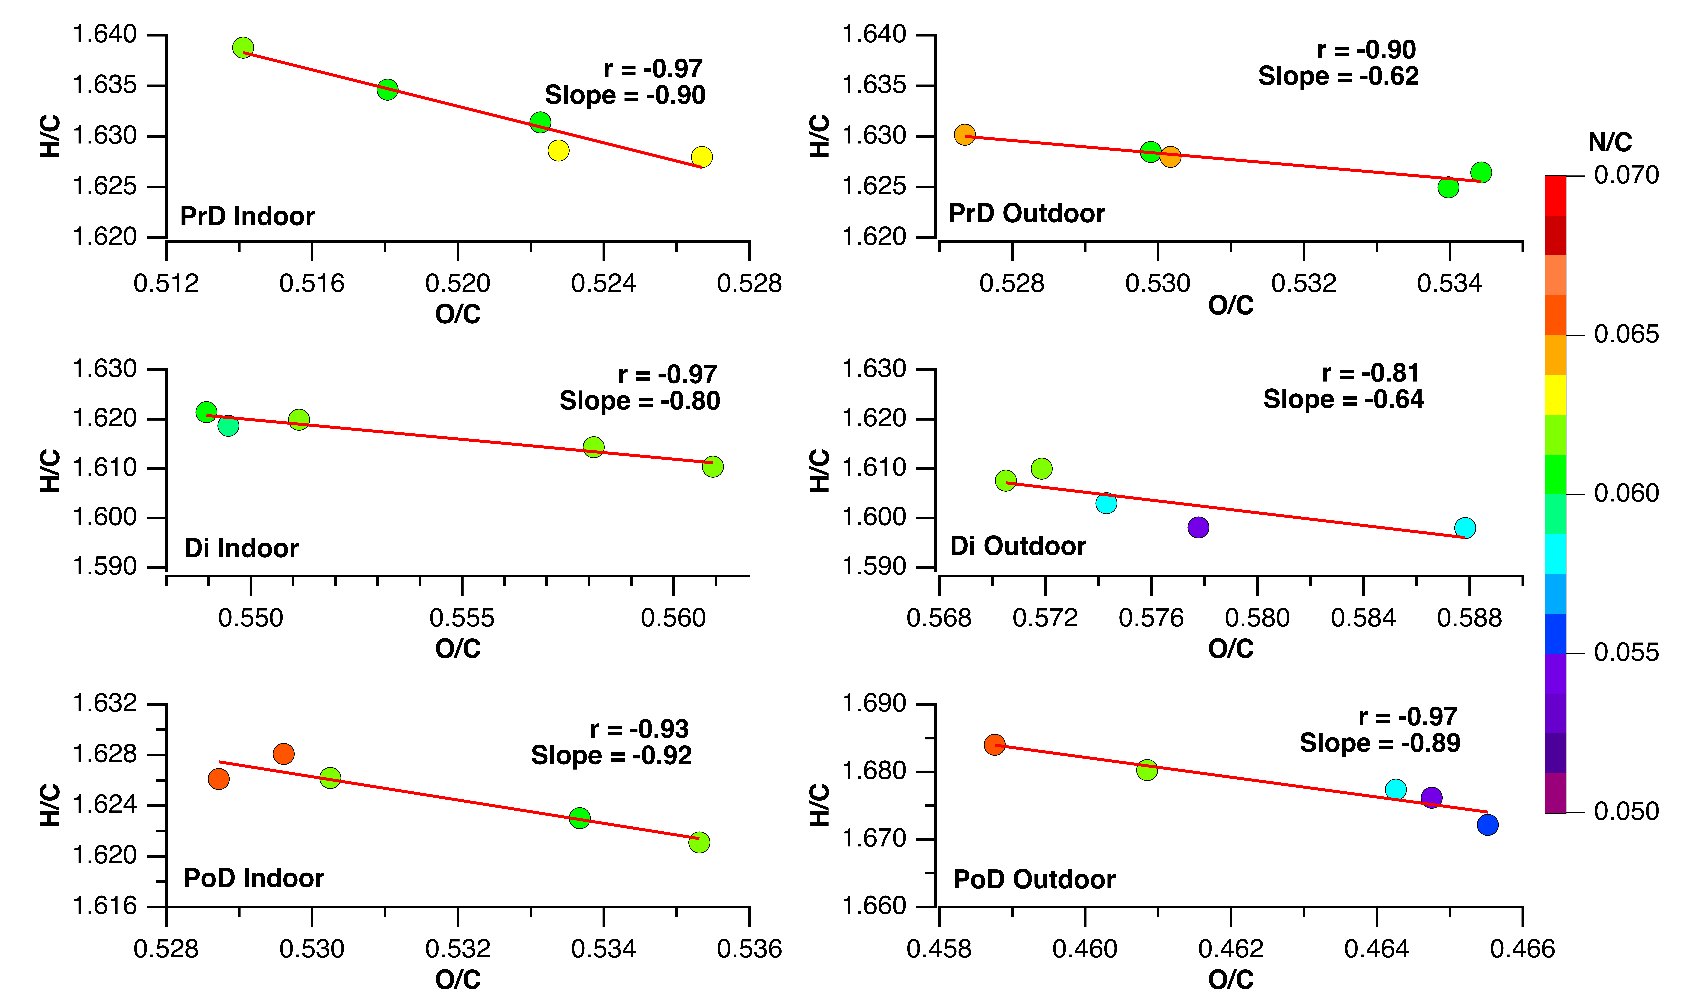


Figure SI 2 V-K diagram in the study locations

**6.The fCO2+ and fC2H3O+ relationship**





Figure SI 3 fC3H3O+ and fCO2+ relationship in the indoor and outdoor locations during the study period

**7. Elemental levels in PM2.5**

Table SI 6 Average Elemental concentration levels in PM2.5 (ng/m3) in the study locations.

|  | **PrD** | |  | **Di** | |  | **PoD** | |
| --- | --- | --- | --- | --- | --- | --- | --- | --- |
|  | **I** | **O** |  | **I** | **O** |  | **I** | **O** |
| **Na** | 776.4 | 851.9 |  | 2324.7 | 2555.2 |  | 904.0 | 948.5 |
| **Mg** | 461.4 | 525.6 |  | 828.1 | 920.1 |  | 626.0 | 646.4 |
| **Al** | 255.4 | 285.8 |  | 2321.6 | 2591.3 |  | 198.0 | 213.3 |
| **Si** | 273.0 | 300.4 |  | 252.2 | 278.6 |  | 169.9 | 285.7 |
| **P** | 7.0 | 7.7 |  | 7.8 | 8.7 |  | 8.0 | 8.8 |
| **S** | 3164.6 | 3550.8 |  | 10160.6 | 11248.6 |  | 5031.3 | 5529.8 |
| **Cl** | 708.8 | 798.9 |  | 2828.3 | 3141.1 |  | 937.9 | 1042.1 |
| **K** | 724.5 | 816.5 |  | 6219.5 | 6910.5 |  | 924.0 | 1035.3 |
| **Ca** | 158.9 | 173.9 |  | 201.6 | 224.5 |  | 111.2 | 122.6 |
| **Ti** | 5.4 | 11.9 |  | 15.4 | 32.9 |  | 8.5 | 11.5 |
| **Cr** | 2.4 | 4.0 |  | 13.4 | 23.3 |  | 6.1 | 3.8 |
| **Mn** | 13.9 | 15.4 |  | 35.9 | 39.8 |  | 16.1 | 18.5 |
| **Fe** | 195.4 | 219.4 |  | 336.3 | 376.2 |  | 147.3 | 162.7 |
| **Co** | 2.3 | 2.6 |  | 2.3 | 2.6 |  | 2.4 | 1.7 |
| **Ni** | 4.1 | 4.8 |  | 4.7 | 5.4 |  | 3.1 | 3.6 |
| **Cu** | 2.7 | 2.6 |  | 37.6 | 41.8 |  | 7.9 | 8.7 |
| **Zn** | 327.0 | 360.0 |  | 500.0 | 543.1 |  | 386.2 | 429.1 |
| **Ga** | 1.0 | 1.2 |  | 4.1 | 4.6 |  | 0.8 | 1.7 |
| **Se** | 0.7 | 1.0 |  | 0.9 | 1.1 |  | 0.6 | 0.7 |
| **Br** | 6.7 | 7.4 |  | 16.0 | 18.7 |  | 10.0 | 11.5 |
| **Sr** | 1.7 | 2.1 |  | 842.9 | 963.0 |  | 12.1 | 13.9 |
| **Mo** | 2.9 | 3.3 |  | 2.9 | 3.1 |  | 2.7 | 3.0 |
| **Cd** | 2.8 | 3.2 |  | 5.8 | 6.3 |  | 9.2 | 9.7 |
| **Sn** | 32.7 | 35.6 |  | 43.6 | 50.0 |  | 42.7 | 47.4 |
| **Sb** | 24.1 | 26.5 |  | 31.3 | 34.6 |  | 25.3 | 28.5 |
| **Ba** | 7.4 | 8.2 |  | 1031.8 | 1154.2 |  | 47.1 | 52.3 |
| **Hg** | 1.2 | 1.3 |  | 1.2 | 1.5 |  | 1.8 | 1.3 |
| **Pb** | 83.9 | 93.6 |  | 215.2 | 234.5 |  | 57.5 | 69.4 |

**8. Indoor-outdoor(I/O) ratio of enrichment factor(EF)**

Table SI 7 I/O ratio of EF

| **Element** | **PrD** | **Di** | **PoD** |
| --- | --- | --- | --- |
| Na | 1.00 | 1.01 | 1.57 |
| Mg | 0.97 | 0.99 | 1.61 |
| Al | 0.98 | 0.99 | 1.34 |
| Si | 1.00 | 1.00 | 1.00 |
| P | 1.00 | 0.99 | 1.55 |
| S | 0.98 | 1.00 | 1.55 |
| Cl | 0.98 | 0.99 | 1.53 |
| K | 0.98 | 0.99 | 1.52 |
| Ca | 1.01 | 0.99 | 1.51 |
| Ti | 0.50 | 0.52 | 1.25 |
| Cr | 0.65 | 0.64 | 1.63 |
| Mn | 0.99 | 1.00 | 1.53 |
| Fe | 0.98 | 0.99 | 1.52 |
| Co | 0.98 | 1.00 | 1.61 |
| Ni | 0.93 | 0.97 | 1.50 |
| Cu | 1.13 | 0.99 | 1.53 |
| Zn | 1.00 | 1.02 | 1.53 |
| Ga | 0.98 | 0.99 | 1.05 |
| Se | 0.76 | 0.93 | 1.52 |
| Br | 0.99 | 0.94 | 1.53 |
| Sr | 0.90 | 0.97 | 1.56 |
| Mo | 0.98 | 1.05 | 1.51 |
| Cd | 0.99 | 1.01 | 1.58 |
| Sn | 1.01 | 0.96 | 1.53 |
| Sb | 1.00 | 1.00 | 1.52 |
| Ba | 0.99 | 0.99 | 1.56 |
| Hg | 1.00 | 0.86 | 1.80 |
| Pb | 0.99 | 1.01 | 1.49 |

**9.Oxidative Potential (OPDTTv) has been reported in different studies worldwide**

Table SI 8 OPDTTv in different studies

| **Location** | **OP** | **Location/activity** | **References** |
| --- | --- | --- | --- |
| Lahore (Pakistan) | 8.9±3.8 | Urban | (Ahmad et al. 2021) |
| Peshawar (Pakistan) | 9.3±3.9 | Urban | (Ahmad et al. 2021) |
| Rohtak (India) | 1.72±1.07 | Urban Background | (Dubey et al. 2024) |
| Terni (Italy) | 0.05±0.02 | Urban | (Massimi et al. 2020) |
| Atlanta (USA) | 0.18 | Urban | (Verma et al. 2012) |

**9. Association between OPDTTv and measured chemical parameters**

Table SI 9 Pearson correlation coefficient (r values ) between elements and OPDTTv. The Green numbers are significant at p<0.05

| Element | r_indoor | r_outdoor |
| --- | --- | --- |
| P | 0.25 | 0.33 |
| Si | 0.011 | -0.45 |
| Al | **0.79** | **0.81** |
| Mg | **0.79** | **0.82** |
| Ti | **0.82** | **0.85** |
| Cr | **0.67** | **0.81** |
| Mn | **0.83** | **0.86** |
| Fe | **0.71** | **0.77** |
| Co | 0.065 | 0.079 |
| Ni | 0.39 | 0.36 |
| Cu | **0.78** | **0.76** |
| Zn | **0.7** | **0.81** |
| Ga | **0.75** | **0.76** |
| Se | 0.47 | 0.36 |
| Br | **0.85** | **0.81** |
| Sr | **0.73** | **0.71** |
| Mo | 0.14 | 0.12 |
| Cd | 0.26 | 0.2 |
| Sn | 0.47 | 0.44 |
| Ba | **0.84** | **0.82** |
| Hg | 0.11 | -0.09 |
| Pb | **0.77** | **0.78** |
| EC | **0.93** | **0.91** |
| OC | **0.8** | **0.68** |
| Ca2+ | **0.71** | **0.56** |
| K+ | **0.8** | **0.88** |
| NH4+ | **0.66** | 0.21 |
| Na+ | -0.3 | **0.57** |
| SO42- | **0.83** | **0.89** |
| NO3- | 0.011 | **0.85** |
| Cl- | **0.72** | **0.69** |

**10. Mass normalized oxidative potential (OPDTTm)**





Figure SI 4 OPDTTm in the study locations

**Comparison of OPDTTm values with other studies**

Table SI 10 OPDTTm values in different study locations

| **Region/City** | **OPDTTm (pmol DTT min⁻¹ μg⁻¹)** | **Season/Context** | **Citations** |
| --- | --- | --- | --- |
| New Delhi, India | 61 ± 29 | Summer | (Verma et al. 2024) |
| Delhi, India | 29–78 | Diwali/Burning Events | (Patel et al. 2021b; Puthussery et al. 2022) |
| Ahmedabad, India | 21–25 | Annual | (Patel et al. 2021a) |
| Mount Abu, India | 10–23 | Seasonal | (Patel and Rastogi 2018) |
| Hangzhou, China | 2–23 | Annual | (Wang et al. 2019) |
| Wuhan, China | 18–53 | Annual | (Liu et al. 2020) |
| Midwestern USA | 5–28 | Annual | (Yu et al. 2021) |
| Room (indoor) | 34.82±13.32 | Pre Diwali (PrD) | This study |
| Room (indoor) | 64.83±10.75 | Diwali(Di) | This study |
| Room (indoor) | 64.46±7.02 | Post Diwali (PoD) | This study |
| Terrace (outdoor) | 40.88±7.30 | Pre Diwali (PrD) | This study |
| Terrace (outdoor) | 61.26±9.75 | Diwali(Di) | This study |
| Terrace (outdoor) | 57.89±4.61 | Post Diwali (PoD) | This study |

**Reference**

DRI Model 2015 Multiwavelength Thermal / Optical Carbon Analyzer. Desert Research Institute, Nevada System of Higher Education

Ahmad M, Yu Q, Chen J, et al (2021) Chemical characteristics, oxidative potential, and sources of PM2.5 in wintertime in Lahore and Peshawar, Pakistan. J Environ Sci (China) 102:148–158. https://doi.org/10.1016/j.jes.2020.09.014

Dubey S, Manwani P, SumanYadav, Phuleria HC (2024) Variation in oxidative potential of fine particulate matter and its association with chemical constituents at a regional site in India. Sci Total Environ 954:176159. https://doi.org/10.1016/j.scitotenv.2024.176159

Liu Q, Lu Z, Xiong Y, et al (2020) Oxidative potential of ambient PM2.5 in Wuhan and its comparisons with eight areas of China. Sci Total Environ 701:134844. https://doi.org/10.1016/j.scitotenv.2019.134844

Massimi L, Ristorini M, Simonetti G, et al (2020) Spatial mapping and size distribution of oxidative potential of particulate matter released by spatially disaggregated sources. Environ Pollut 266:. https://doi.org/10.1016/j.envpol.2020.115271

Patel A, Rastogi N (2018) Seasonal variability in chemical composition and oxidative potential of ambient aerosol over a high altitude site in western India. Sci Total Environ 644:1268–1276. https://doi.org/10.1016/j.scitotenv.2018.07.030

Patel A, Rastogi N, Gandhi U, Khatri N (2021a) Oxidative potential of atmospheric PM10 at five different sites of Ahmedabad, a big city in Western India. Environ Pollut 268:115909. https://doi.org/10.1016/j.envpol.2020.115909

Patel A, Satish R, Rastogi N (2021b) Remarkably High Oxidative Potential of Atmospheric PM2.5Coming from a Large-Scale Paddy-Residue Burning over the Northwestern Indo-Gangetic Plain. ACS Earth Sp Chem 5:2442–2452. https://doi.org/10.1021/acsearthspacechem.1c00125

Puthussery J V., Dave J, Shukla A, et al (2022) Effect of Biomass Burning, Diwali Fireworks, and Polluted Fog Events on the Oxidative Potential of Fine Ambient Particulate Matter in Delhi, India. Environ Sci Technol 56:14605–14616. https://doi.org/10.1021/acs.est.2c02730

Smith KR, Peel JL (2010) Mind the gap. Environ Health Perspect 118:1643–1645. https://doi.org/10.1289/ehp.1002517

Verma PK, Devaprasad M, Dave J, et al (2024) Summertime oxidative potential of atmospheric PM2.5 over New Delhi: Effect of aerosol ageing. Sci Total Environ 920:170984. https://doi.org/10.1016/j.scitotenv.2024.170984

Verma V, Rico-Martinez R, Kotra N, et al (2012) Contribution of water-soluble and insoluble components and their hydrophobic/hydrophilic subfractions to the reactive oxygen species-generating potential of fine ambient aerosols. Environ Sci Technol 46:11384–11392. https://doi.org/10.1021/es302484r

Wang J, Lin X, Lu L, et al (2019) Temporal variation of oxidative potential of water soluble components of ambient PM2.5 measured by dithiothreitol (DTT) assay. Sci Total Environ 649:969–978. https://doi.org/10.1016/j.scitotenv.2018.08.375

Yu H, Puthussery JV, Wang Y, Verma V (2021) Spatiotemporal variability in the oxidative potential of ambient fine particulate matter in the Midwestern United States. Atmos Chem Phys 21:16363–16386. https://doi.org/10.5194/acp-21-16363-2021
